# Supplementary material for: Plasma and CSF neurofilament light chain distinguish neurodegenerative from primary psychiatric conditions in a clinical setting
Source: PubMed Central journal article supplement (PMC11567869; doi:10.1002/alz.14278), 2024-10-06
Supplement: ALZ-20-7989-s002.pdf [file ALZ-20-7989-s002.pdf]

**SUPPLEMENTARY MATERIAL**

|                   | <b>ND</b>        | <b>PPD</b>        | <b>N</b> |
|-------------------|------------------|-------------------|----------|
|                   | <b>N=63</b>      | <b>N=22</b>       |          |
| age               | 60.9 [57.4;65.0] | 58.6 [51.3;63.7]  | 85       |
| sex: Female       | 27 (42.9%)       | 7 (31.8%)         | 85       |
| weight            | 74.2 [63.2;91.7] | 82.0 [79.0;86.1]  | 67       |
| nfl               | 24.4 [15.6;35.8] | 10.3 [7.55;12.3]  | 85       |
| lognfl            | 1.39 [1.19;1.55] | 1.01 [0.88;1.09]  | 85       |
| nfl.z             | 2.05 [1.44;2.69] | 0.15 [-0.54;1.25] | 85       |
| nfl.percentile    | 0.98 [0.92;1.00] | 0.56 [0.30;0.89]  | 85       |
| nfl_csf_pilot2024 | 1048 [741;1585]  | 495 [386;671]     | 85       |
| logcsfnfl         | 3.02 [2.87;3.20] | 2.69 [2.59;2.83]  | 85       |

**Supplementary Table 1. Subset with paired CSF and plasma**  
Data are median [interquartile range] or n (%).

|                   | <b>ND</b>        | <b>PPD</b>        | <b>Control</b>    | <b>N</b> |
|-------------------|------------------|-------------------|-------------------|----------|
|                   | <b>N=73</b>      | <b>N=55</b>       | <b>N=124</b>      |          |
| age               | 60.8 [52.8;67.8] | 54.3 [43.7;59.4]  | 63.2 [56.0;70.0]  | 252      |
| sex: Female       | 32 (43.8%)       | 32 (58.2%)        | 88 (71.0%)        | 252      |
| weight            | 75.8 [58.4;86.0] | 87.0 [71.5;100]   | 76.0 [66.0;84.0]  | 183      |
| nfl               | 26.8 [16.6;43.0] | 10.1 [8.05;12.8]  | 12.5 [8.70;17.8]  | 252      |
| lognfl            | 1.43 [1.22;1.63] | 1.00 [0.91;1.11]  | 1.10 [0.94;1.25]  | 252      |
| nfl.z             | 2.36 [1.34;3.12] | 0.70 [-0.01;1.53] | 0.47 [-0.13;1.24] | 252      |
| nfl.percentile    | 0.99 [0.91;1.00] | 0.76 [0.50;0.94]  | 0.68 [0.45;0.89]  | 252      |
| nfl_csf_pilot2024 | .                | .                 | .                 | 0        |
| logcsfnfl         | .                | .                 | .                 | 0        |

**Supplementary Table 2. Subset with plasma and no CSF**  
Data are median [interquartile range] or n (%).

| Categorisation                   | Age                   | AUC                     | Cutoff                    | Cutoff ratio <sup>^^</sup> | Spec          | Sens         |
|----------------------------------|-----------------------|-------------------------|---------------------------|----------------------------|---------------|--------------|
| <b>ND vs PPD</b>                 |                       |                         |                           |                            |               |              |
| Plasma NfL                       | All                   | 0.86<br>[0.81,<br>0.92] | 14.1                      | 1.40                       | 81%           | 85%          |
| CSF NfL                          | All                   | 0.89<br>[0.82,<br>0.96] | 823<br>(532)              | 1.66<br>(1.07)             | 95%<br>(64%)  | 71%<br>(95%) |
| Plasma NfL                       | Young<br>er<br>40-<60 | 0.89<br>[0.83,<br>0.96] | 14.6 <sup>a</sup>         | 1.45                       | 90%           | 84%          |
| CSF NfL                          | Young<br>er<br>40-<60 | 0.97<br>[0.92,<br>1]    | 814 <sup>b</sup><br>(558) | 1.88<br>(1.29)             | 100%<br>(85%) | 88%<br>(96%) |
| Plasma NfL                       | Older<br>60-<70       | 0.76<br>[0.63,<br>0.89] | 11.9 <sup>c</sup>         | 1.03                       | 55%           | 91%          |
| CSF NfL                          | Older<br>60-<70       | 0.76<br>[0.59,<br>0.92] | 967 <sup>d</sup>          | 1.36                       | 100%          | 55%          |
| <b>AD vs PPD <sup>e</sup></b>    |                       |                         |                           |                            |               |              |
| Plasma NfL                       | All                   | 0.89<br>[0.84,<br>0.95] | 14.6                      | 1.45                       | 82%           | 93%          |
| CSF NfL                          | All                   | 0.95<br>[0.90,<br>1]    | 824                       | 1.66                       | 95%           | 87%          |
| <b>bvFTD vs PPD <sup>f</sup></b> |                       |                         |                           |                            |               |              |
| Plasma NfL                       | All                   | 0.79<br>[0.65,<br>0.92] | 11.9                      | 1.18                       | 69%           | 81%          |
| CSF NfL                          | All                   | 0.86<br>[0.70,<br>1]    | 975                       | 1.97                       | 100%          | 63%          |

**Supplementary Table 3. Details of ROC curve analyses and diagnostic test parameters, including cut-off expressed as a ratio**

AD: Alzheimer disease; AUC: area under the curve; bvFTD: behavioural variant frontotemporal dementia; CSF: cerebrospinal fluid; LR+: positive likelihood ratio; LR-: negative likelihood ratio; NfL: neurofilament light chain; ND: neurodegenerative disorder; NPV: negative predictive value; PPD: primary psychiatric disorder; PPV: positive predictive value; Sens: sensitivity; Spec: specificity  
<sup>^^</sup>: The cut-off ratio was calculated based on a ratio of the optimal cut-off and the median NfL level of the PPD group for each categorisation/comparison

a: Alternative cut-offs optimising specificity were: 30.8pg/mL (100% specificity), 24.4pg/mL (98% specificity), 24pg/mL (96% specificity), 14.6pg/mL (90%), and for sensitivity: 6.02pg/mL (100%), 8.04pg/mL (98%), 10.1pg/mL (94%), 11.5pg/mL (90%).

b: Alternative CSF cutoffs for specificity were 814pg/mL (100% specificity), 743pg/mL (92%), 558pg/mL (85%), and for sensitivity were 445pg/mL (100% sensitivity), 558pg/mL (96% sensitivity, 85% specificity), 638pg/mL (92%).

c: Alternative cut-offs associated with 100%, 95%, 90% specificity were 74.9pg/mL, 31.8pg/mL, 31pg/mL, respectively. Alternative cut-offs optimising for sensitivity were 7.59pg/mL (100% sensitivity), 10.35pg/mL (98%), 10.85pg/mL (95%), 11.9pg/mL (91%).

d: Alternative cut-offs optimising for specificity were 967pg/mL (100%) and 823pg/mL (88%), and for sensitivity were 511pg/mL (97%), 571pg/mL (94%), 600pg/mL (90%).

e: Higher DOR and accuracy in younger people (154 and infinity, 91% and 96%, for plasma and CSF NfL respectively)

f: Higher DOR and accuracy in younger people (16.5 and infinity, 86% and 94%, for plasma and CSF NfL respectively)

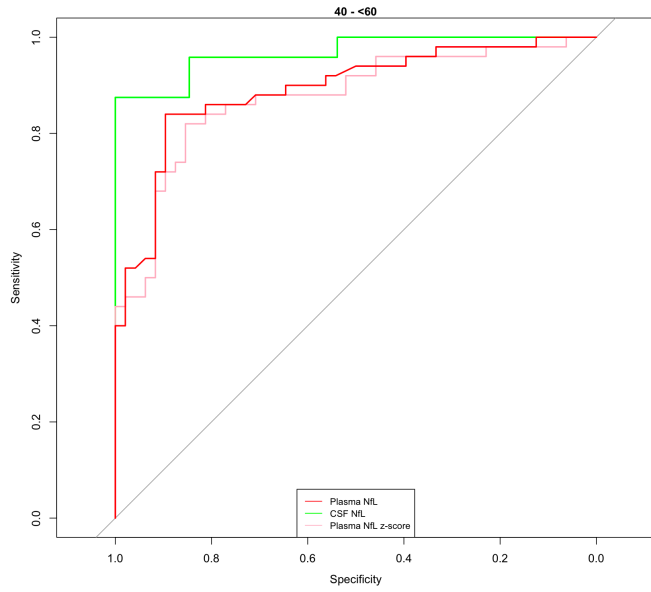

**Supplementary Figure 1. ROC analysis for younger people (40 - <60yo)**

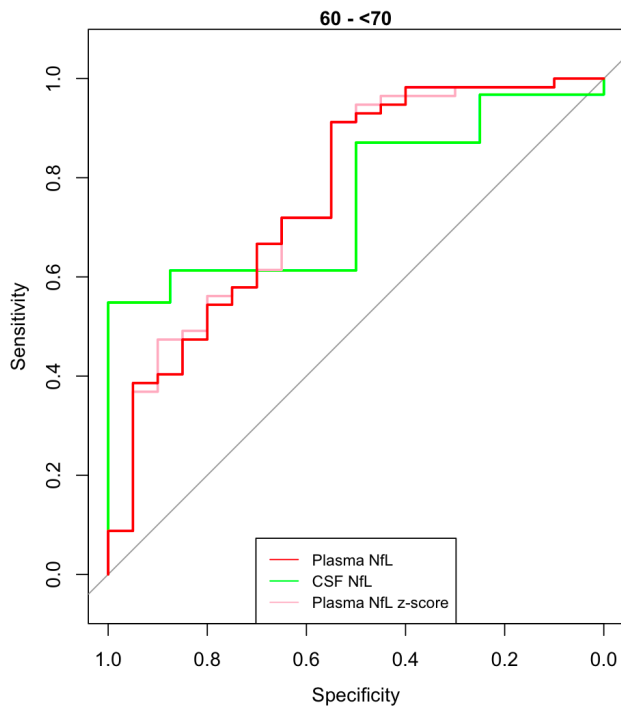

**Supplementary Figure 2. ROC analysis for older people 60 - <70**

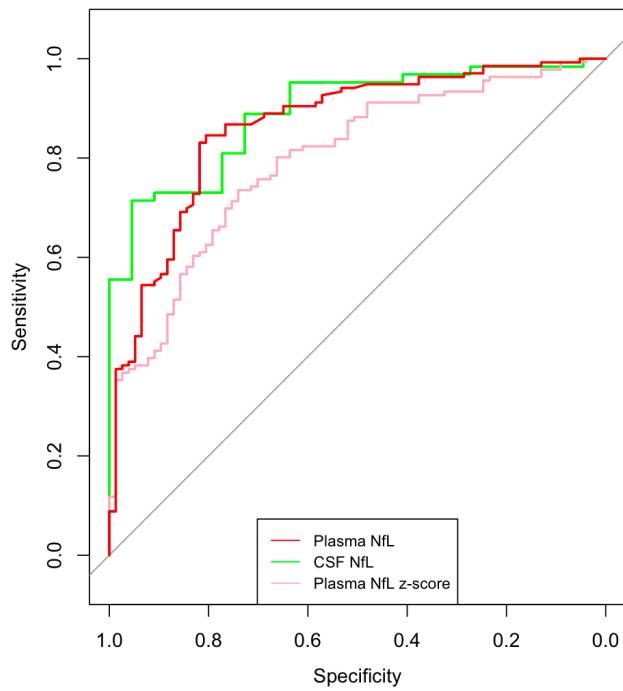

**Supplementary Figure 3. ROC analysis for all ages including z-scores**

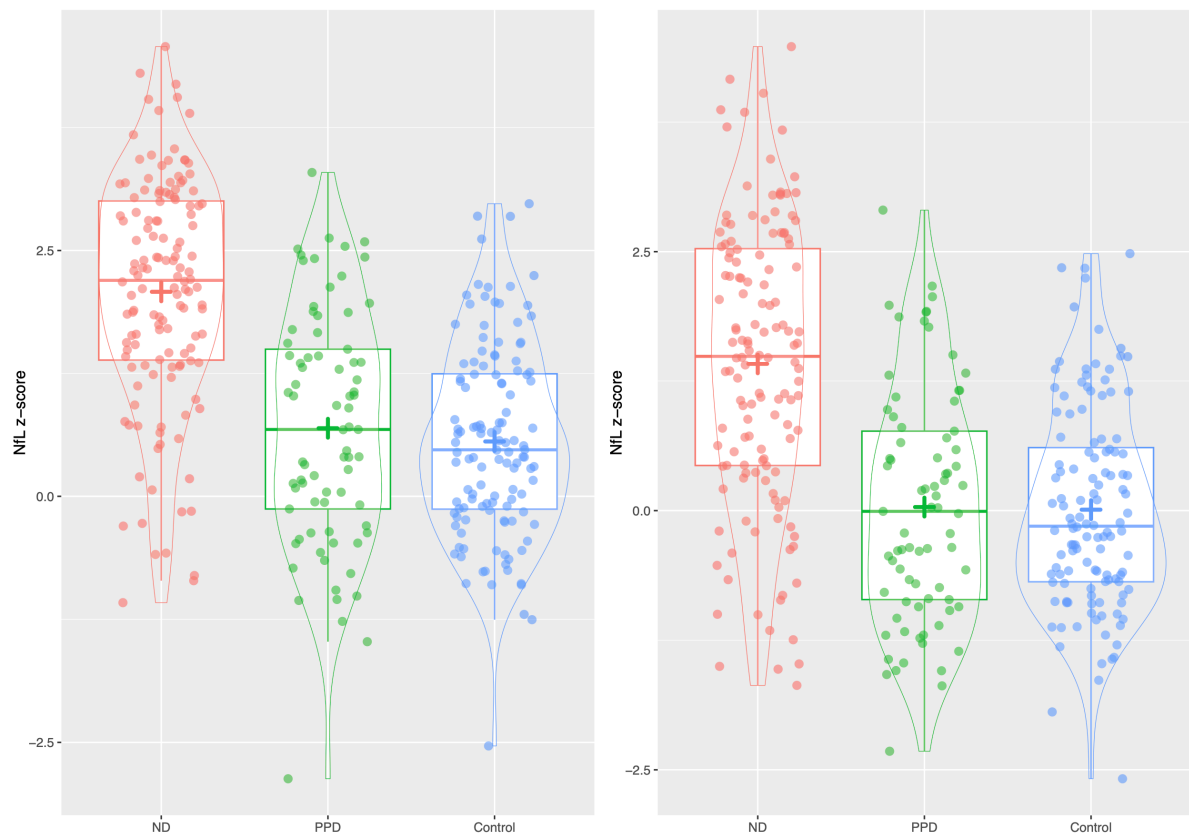

**Supplementary Figure 4. Z-scores before adjustment/conversion (left) and after adjustment/conversion (right).**

|                         | <b>ND</b>        | <b>PPD</b>         | <b>Control</b>     | <b>Control Group 2</b> | <b>N</b> |
|-------------------------|------------------|--------------------|--------------------|------------------------|----------|
|                         | <b>N=136</b>     | <b>N=77</b>        | <b>N=124</b>       | <b>N=1926</b>          |          |
| age                     | 60.8 [55.9;65.9] | 54.8 [46.6;61.8]   | 63.2 [56.0;70.0]   | 56.0 [48.0;64.0]       | 2263     |
| sex: Female             | 59 (43.4%)       | 39 (50.6%)         | 88 (71.0%)         | 1218 (63.2%)           | 2263     |
| weight                  | 75.0 [59.8;89.1] | 84.0 [73.4;98.8]   | 76.0 [66.0;84.0]   | . [.;.]                | 250      |
| nfl                     | 25.2 [15.8;39.6] | 10.1 [7.85;12.5]   | 12.5 [8.70;17.8]   | 8.34 [6.10;11.6]       | 2263     |
| lognfl                  | 1.40 [1.20;1.60] | 1.00 [0.89;1.10]   | 1.10 [0.94;1.25]   | 0.92 [0.79;1.06]       | 2263     |
| nfl.z                   | 2.20 [1.39;3.00] | 0.68 [-0.13;1.50]  | 0.47 [-0.13;1.24]  | -0.01 [-0.70;0.71]     | 2263     |
| nfl.percentile          | 0.99 [0.92;1.00] | 0.75 [0.45;0.93]   | 0.68 [0.45;0.89]   | 0.50 [0.24;0.76]       | 2263     |
| nfl.adjusted            | 17.2 [11.3;26.3] | 7.69 [6.27;9.20]   | 9.93 [7.77;14.3]   | 8.34 [6.10;11.6]       | 2263     |
| lognfl.adjusted         | 1.24 [1.05;1.42] | 0.89 [0.80;0.96]   | 1.00 [0.89;1.16]   | 0.92 [0.79;1.06]       | 2263     |
| nfl.adjusted.z          | 1.49 [0.44;2.53] | -0.01 [-0.86;0.77] | -0.15 [-0.69;0.61] | -0.01 [-0.70;0.71]     | 2263     |
| nfl.adjusted.percentile | 0.93 [0.67;0.99] | 0.50 [0.20;0.78]   | 0.44 [0.25;0.73]   | 0.50 [0.24;0.76]       | 2263     |

**Supplementary Table 4. Adjusted plasma NfL levels and details of Control Group 2**
